# Supplementary material for: Facile preparation of cancer-specific polyelectrolyte nanogels from natural and synthetic sugar polymers
Source: Royal Society of Chemistry journal article supplement (doi:10.1039/c5tb00539f), 2015-01-01
Supplement: c5tb00539f1.pdf [file c5tb00539f1.pdf]

## Facile preparation of cancer-specific polyelectrolyte nanogels from natural and synthetic sugar polymers

Fang Yuan,<sup>a</sup> Shasha Wang,<sup>a</sup> Wei Lu,<sup>b</sup> Gaojian Chen,<sup>\*b</sup> Kehua Tu,<sup>a</sup> Hongliang Jiang<sup>a</sup> and Li-Qun Wang<sup>\*a</sup>

<sup>a</sup>MOE Key Laboratory of Macromolecular Synthesis and Functionalization, Department of Polymer Science and Engineering, Zhejiang University, Hangzhou 310027, P. R. China.

<sup>b</sup>Center for Soft Condensed Matter Physics and Interdisciplinary Research, Soochow University, Suzhou, 215006, P. R. China.

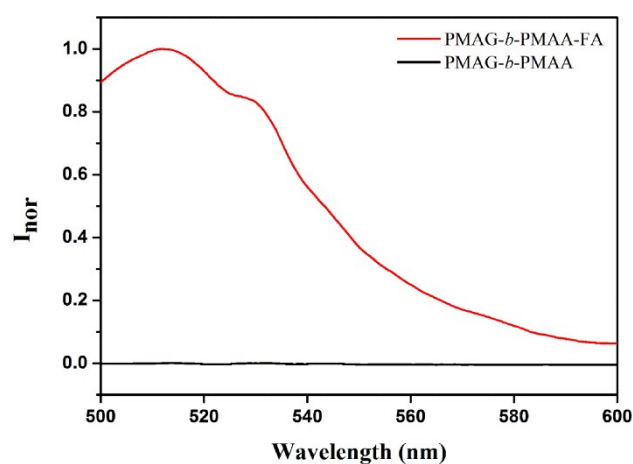

Fig. S1. Fluorescence emission spectra of PMAG-*b*-PMAA and PMAG-*b*-PMAA-FA ( $E_x = 485$  nm) with normalized fluorescence intensities ( $I_{\text{nor}}$ ) in 10 mM HEPES buffer solution.

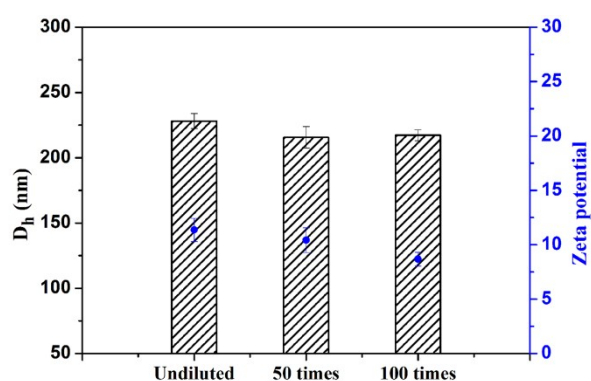

Fig. S2. Stability over concentration of glyco/CS-nanogels (neg/pos ratio = 0.4) by diluting 50 or 100-fold with 10 mM HEPES buffer solution (pH 7.4, NaCl 0.15 M)

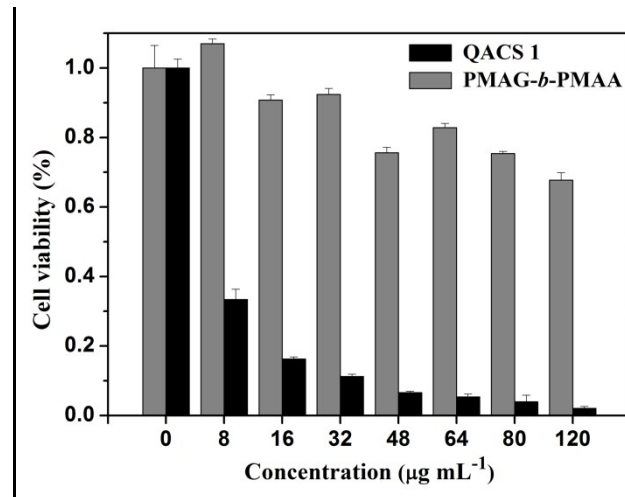

Fig. S3. WST-8 assay results of K562 cells treated with free QACS 1 or PMAG-*b*-PMAA (equivalent molarity as it is in glyco/CS nanogels) after incubation for 24 h.
